# Supplementary material
Source: publisher site journal article supplement (https://www.dovepress.com/get_supplementary_file.php?f=258054.docx)
Supplement: Supplementary file 1 [file get_supplementary_file.php]

**Supplementary Information**

**Regulating Interactions between Targeted Nanocarriers and Mononuclear Phagocyte System via an Esomeprazole-Based Preconditioning Strategy**

Zakia Belhadj1, Bing He1, Jijun Fu2, Hua Zhang1, Xueqing Wang1, Wenbing Dai*1, Qiang Zhang*1

1Beijing Key Laboratory of Molecular Pharmaceutics and New Drug Delivery Systems, State Key Laboratory of Natural and Biomimetic Drugs, School of Pharmaceutical Sciences, Peking University, Beijing 100191, China

2 School of Pharmaceutical Sciences, Guangzhou Medical University, Guangzhou 511436, China

Correspondence: Qiang Zhang; Wenbing Dai

Beijing Key Laboratory of Molecular Pharmaceutics and New Drug Delivery Systems, State Key Laboratory of Natural and Biomimetic Drugs, School of Pharmaceutical Sciences, Peking University, Beijing 100191, China

E-mail: [zqdodo@bjmu.edu.cn](mailto:zqdodo@bjmu.edu.cn); phone: +86-10-82802791

E-mail: [daiwb@bjmu.edu.cn](mailto:daiwb@bjmu.edu.cn) ; phone: +86-10-82805724


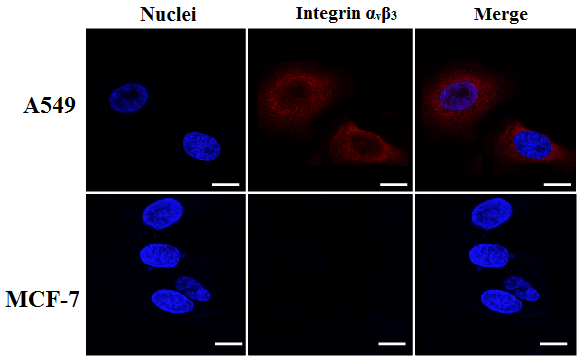


**Figure S1** Integrin αvβ3 expression in A549 and MCF-7 cells. Red represents Integrin αvβ3 staining, and blue represents Hoechst fluorescence. (Scale bar = 10 μm).

**Figure S2** MALDI-TOF-MS analysis of NHS-PEG-DSPE and c(RGDm7)-PEG-DSPE.

**Figure S3** Distribution of DiO-loaded lipid vesicles in the tumors of nude mice bearing A549 xenografts. Blue: Hoechst stained cell nuclei. Green: DiO-loaded lipid vesicles. Bars represent 100 μm.

**Figure S4** *In vivo* biocompatibility evaluation. (**A**) Histological analysis of the main organs of A549 tumor-bearing nude mice. Bars represent 200 μm. (**B**) Serum biochemical analysis of heart, liver, and kidney function markers of normal mice (mean ± SD, n = 3).

**Table S1** DOX pharmacokinetic parameters following i.v. injection of various nanocarrier groups to SD rats

| **Group** | **AUC0-72 (µg.h/mL)** | **MRT(h)** | **t1/2 (h)** |
| --- | --- | --- | --- |
| LS-GE/DOX | 1591.01 ± 119.15 | 26.67 ± 4.56 | 21.27 ± 4.37 |
| c(RGDm7)-LS-GE/DOX | 1086.33 ± 65.64 | 24.56 ± 3.08 | 18.23 ± 1.62 |
| ESO+LS-GE/DOX | 2352.18 ± 257.02 | 32.24 ± 7.92 | 25.65 ± 8.80 |
| ESO+c(RGDm7)-LS-GE/DOX | 2021.16 ± 210.97 | 29.72 ± 4.67 | 22.42 ± 2.56 |

**Table S2** GE pharmacokinetic parameters following i.v. injection of various nanocarrier groups to SD rats

| **Group** | **AUC0-24 (µg.h/mL)** | **MRT(h)** | **t1/2 (h)** |
| --- | --- | --- | --- |
| LS-GE/DOX | 224.11 ± 36.12 | 7.04 ± 1.38 | 6.44 ± 2.53 |
| c(RGDm7)-LS-GE/DOX | 174.77 ± 31.02 | 4.45 ± 1.43 | 3.97 ± 0.82 |
| ESO+LS-GE/DOX | 431.25 ± 34.66 | 8.56 ± 1.85 | 8.40 ± 1.93 |
| ESO+c(RGDm7)-LS-GE/DOX | 370.56 ± 68.31 | 8.80 ± 1.94 | 7.57 ± 2.52 |
